# Supplementary material
Source: Royal Society of Chemistry journal article supplement (doi:10.1039/d6ta02568d)
Supplement: d6ta02568d1.pdf [file d6ta02568d1.pdf]

Supporting Information for

**Photosensitizing Covalent Organic Frameworks for Activating  
Polyoxometalates toward Efficient Photocatalytic Sulfide  
Oxidation**

Yanyan Guo <sup>ab, 1</sup>, Jialing Chen <sup>a, 1</sup>, Na Xu <sup>\*a</sup>, Ye Chen <sup>b</sup> Xiuli Wang <sup>\*a</sup>

*<sup>a</sup> College of Chemistry, Bohai University, Professional Technology Innovation Center of Liaoning Province for Conversion Materials of Solar Cell, Jinzhou 121013, PR China*

*<sup>b</sup> State Key Laboratory of Advanced Fiber Materials, College of materials science and engineering, Donghua University, Shanghai, 201620, China*

## Table of Contents

|                                                                                                                                                                                                                                                                                                                                                                                                                                                                      |    |
|----------------------------------------------------------------------------------------------------------------------------------------------------------------------------------------------------------------------------------------------------------------------------------------------------------------------------------------------------------------------------------------------------------------------------------------------------------------------|----|
| Table of Contents .....                                                                                                                                                                                                                                                                                                                                                                                                                                              | 2  |
| Experimental section .....                                                                                                                                                                                                                                                                                                                                                                                                                                           | 4  |
| <b>Fig. S1</b> (a) PXRD patterns of $\text{PMo}_{12}$ , TpTG and $\text{PMo}_{12}@\text{TpTG}$ ; (b) PXRD patterns of $\text{SiW}_{12}$ , TpTG and $\text{SiW}_{12}@\text{TpTG}$ . .....                                                                                                                                                                                                                                                                             | 5  |
| <b>Fig. S2</b> (a) FT-IR spectra of TpTG, $\text{PMo}_{12}@\text{TpTG}$ and $\text{PMo}_{12}$ ; (b) FT-IR spectra of $\text{SiW}_{12}$ , TpTG and $\text{SiW}_{12}@\text{TpTG}$ . .....                                                                                                                                                                                                                                                                              | 5  |
| <b>Fig. S3</b> (a) TGA of TpTG, $\text{PMo}_{12}@\text{TpTG}$ and $\text{PMo}_{12}$ ; (b) TGA of TpTG, $\text{SiW}_{12}@\text{TpTG}$ and $\text{SiW}_{12}$ . .....                                                                                                                                                                                                                                                                                                   | 6  |
| <b>Fig. S4</b> Aperture diagram of TpTG, $\text{PW}_{12}$ , $\text{PW}_{12}(28\%)@\text{TpTG}$ , $\text{PW}_{12}(30\%)@\text{TpTG}$ , $\text{PW}_{12}(32\%)@\text{TpTG}$ , and $\text{PW}_{12}(34\%)@\text{TpTG}$ . .....                                                                                                                                                                                                                                            | 6  |
| <b>Fig. S5</b> (a) $\text{N}_2$ sorption isotherms of TpTG and different $\text{PMo}_{12}$ added amounts of $\text{PMo}_{12}@\text{TpTG}$ measured at 77 K; (b) $\text{N}_2$ sorption isotherms of TpTG and different $\text{SiW}_{12}$ added amounts of $\text{SiW}_{12}@\text{TpTG}$ measured at 77 K; (c) The pore size distribution of TpTG and $\text{PMo}_{12}@\text{TpTG}$ ; (d) The pore size distribution of TpTG and $\text{SiW}_{12}@\text{TpTG}$ . ..... | 7  |
| <b>Fig. S6</b> (a–b) SEM image of $\text{PMo}_{12}(36\%)@\text{TpTG}$ ; (c–d) SEM images of $\text{SiW}_{12}(30\%)@\text{TpTG}$ ; (e–i) EDS images of $\text{PMo}_{12}(36\%)@\text{TpTG}$ ; (j–n) EDS mapping images of $\text{SiW}_{12}(30\%)@\text{TpTG}$ . .....                                                                                                                                                                                                  | 7  |
| <b>Fig. S7</b> (a) Transient photocurrent responses of $\text{PW}_{12}(28\%)@\text{TpTG}$ , $\text{PW}_{12}(30\%)@\text{TpTG}$ , $\text{PW}_{12}(32\%)@\text{TpTG}$ , and $\text{PW}_{12}(34\%)@\text{TpTG}$ ; (b) EIS Nyquist plots of $\text{PW}_{12}(28\%)@\text{TpTG}$ , $\text{PW}_{12}(30\%)@\text{TpTG}$ , $\text{PW}_{12}(32\%)@\text{TpTG}$ , and $\text{PW}_{12}(34\%)@\text{TpTG}$ . .....                                                                | 8  |
| <b>Fig. S8</b> M-S plots of TpTG. ....                                                                                                                                                                                                                                                                                                                                                                                                                               | 8  |
| <b>Fig. S9</b> M-S plots of (a) $\text{PW}_{12}(28\%)@\text{TpTG}$ , (b) $\text{PW}_{12}(30\%)@\text{TpTG}$ , (c) $\text{PW}_{12}(32\%)@\text{TpTG}$ , (d) $\text{PW}_{12}(34\%)@\text{TpTG}$ , (e) $\text{PMo}_{12}(36\%)@\text{TpTG}$ , and (f) $\text{SiW}_{12}(30\%)@\text{TpTG}$ . .....                                                                                                                                                                        | 8  |
| <b>Fig. S10</b> Reaction kinetics of $\text{PW}_{12}(34\%)@\text{TpTG}$ under different solvent conditions. ..                                                                                                                                                                                                                                                                                                                                                       | 8  |
| <b>Fig. S11</b> Effect of $\text{H}_2\text{O}_2$ dosage on MPS oxidation: (a) 1.1 mmol, (b) 1.2 mmol, (c) 1.3 mmol, and (d) 1.5 mmol. ....                                                                                                                                                                                                                                                                                                                           | 9  |
| <b>Table S1</b> Physicochemical properties of $\text{POM}@\text{TpTG}$ composites. ....                                                                                                                                                                                                                                                                                                                                                                              | 11 |
| <b>Table S2</b> The photoelectric performance and catalytic rate of $\text{PW}_{12}@\text{TpTG}$ . ....                                                                                                                                                                                                                                                                                                                                                              | 12 |
| <b>Table S3</b> Solvent effect on the photocatalytic oxidation of MPS. ....                                                                                                                                                                                                                                                                                                                                                                                          | 12 |
| <b>Table S4</b> The oxidation effect of $\text{POM}@\text{TpTG}$ composites with different POMs loadings on photocatalytic MPS was studied. <sup>a</sup> .....                                                                                                                                                                                                                                                                                                       | 12 |

|                                                                                                                                                                      |    |
|----------------------------------------------------------------------------------------------------------------------------------------------------------------------|----|
| <b>Table S5</b> The Comparison of the photocatalytic performance of $PW_{12}@TpTG$ with state-of-the-art COF/MOF/POM-based photocatalysts for sulfide oxidation..... | 13 |
| <b>Table S6</b> The selective oxidation of CEES catalyzed by $PW_{12}(32\%)@TpTG$ was studied. <sup>a</sup> .....                                                    | 13 |
| <b>Table S7</b> ICP-OES analysis of tungsten (W) leaching from $PW_{12}@TpTG$ catalyst after one catalytic cycle. ....                                               | 13 |
| <b>Table S8</b> $PW_{12}(32\%)@TpTG$ photocatalytic oxidation of different sulfides <sup>a</sup> . ....                                                              | 14 |
| References .....                                                                                                                                                     | 14 |

## Experimental section

### Materials and methods

1, 3, 5-triformylphloroglucinol (Tp), TG were purchased from Jilin Research and Extension Technology Company. Keggin-type  $\text{H}_3\text{PMo}_{12}\text{O}_{40}$  ( $\text{PMo}_{12}$ ),  $\text{H}_3\text{PW}_{12}\text{O}_{40}$  ( $\text{PW}_{12}$ ),  $\text{H}_3\text{SiW}_{12}\text{O}_{40}$  ( $\text{SiW}_{12}$ ), mesitylene, 1,4-dioxane were all purchased by Aladdin Reagents. Powder X-ray diffraction (PXRD) patterns were measured on a D/teX Ultra diffractometer with Cu  $\text{K}\alpha$  radiation ( $\lambda = 1.5418 \text{ \AA}$ ). Diffraction intensity data were collected with  $2\theta$  values ranging from  $3^\circ$  to  $50^\circ$  at a scanning speed of  $2^\circ/\text{min}$  and a step size of  $0.01^\circ$ . FT-IR spectroscopy was performed on a Perkin Elmer spectrometer in the wavenumber range of  $500\text{--}4000 \text{ cm}^{-1}$ . Thermogravimetric analyses were conducted using a Hitachi TG/DTA7200 analyzer under  $\text{N}_2$  flow with a heating rate of  $10^\circ\text{C}/\text{min}$  from 25 to  $800^\circ\text{C}$ . Scanning electron microscope (SEM) images and energy-dispersive spectroscopy (EDS) were acquired on a cold field-emission scanning electron microscope (S-4800). Transmission electron microscopy (TEM) was performed on a JEOL JEM-2100F operated at 200 kV, equipped with an EDS detector (X-MaxN 80T IE250). UV-Vis absorption spectra were collected on an SP 1901 UV-Vis spectrophotometer. X-ray photoelectron spectroscopy (XPS) was performed using a Thermo Scientific K-Alpha photoelectron spectrometer. Elemental analysis was conducted on a UNICUBE-Elementar analyzer.

### Electrochemical Measurements

Electrochemical impedance spectroscopy (EIS), photoelectrochemical measurements, and Mott-Schottky plots were carried out on a CHI-760 workstation. The experimental conditions are as follows: (1) Reference electrode: Ag/AgCl; the potential was converted to the NHE scale via  $\text{ENHE} = \text{EAg/AgCl} + 0.197 \text{ V}$ . (2) Working electrode: FTO conductive glass ( $1.0 \text{ cm}^2$ ). (3) Electrolyte:  $0.1 \text{ M Na}_2\text{SO}_4$  ( $\text{pH} = 7.0$ ).

### Photocatalytic Reaction

The photocatalytic oxidation of sulfides was performed as follows: MPS ( $0.5 \text{ mmol}$ ), catalyst ( $0.7 \text{ mmol}\%$ ), naphthalene (internal standard,  $15 \text{ mg}$ ), solvent ( $3 \text{ mL}$ ),  $25^\circ\text{C}$  (thermostated),  $300 \text{ W Xe}$  lamp. The photocatalytic activity of Keggin-type POM@TpTG composites ( $\text{PW}_{12}$ ,  $\text{PMo}_{12}$ ,  $\text{SiW}_{12}$ ) for sulfide oxidation was evaluated under visible light ( $\lambda \geq 425 \text{ nm}$ ) using  $30\% \text{ H}_2\text{O}_2$  as oxidant. After the reaction was completed, the solution was filtered through a filter membrane (pore size:  $0.22 \mu\text{m}$ ,

diameter: 13 mm). The reaction mixture was analyzed using a Shimadzu GC-7900 gas chromatograph equipped with a TM-5 Sil capillary column and a flame ionization detector (FID). The injection volume was 1  $\mu$ L, and the column was maintained at 150  $^{\circ}$ C for 9 min. Naphthalene was used as the internal standard for quantitative analysis, and the product yield was calculated by the internal standard method.

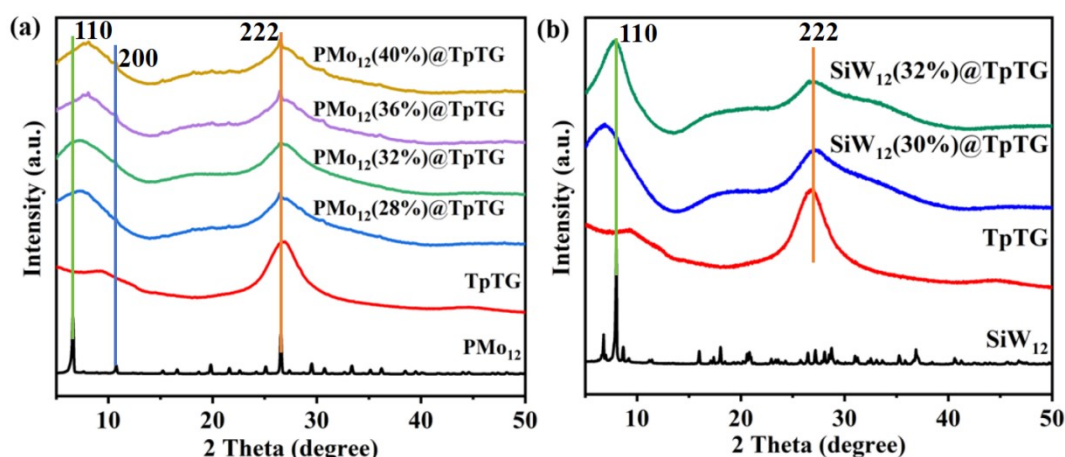

**Fig. S1** (a) XRD patterns of PMo<sub>12</sub>, TpTG and PMo<sub>12</sub>@TpTG; (b) XRD patterns of SiW<sub>12</sub>, TpTG and SiW<sub>12</sub>@TpTG.

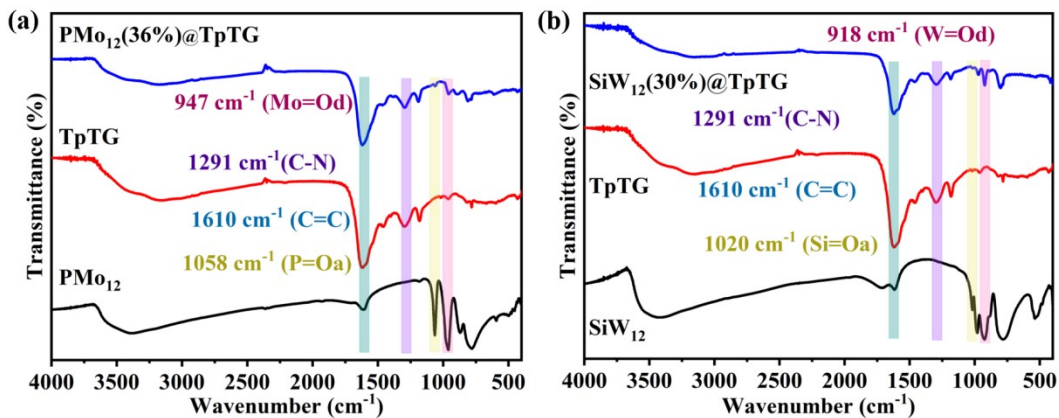

**Fig. S2** (a) FT-IR spectra of TpTG, PMo<sub>12</sub>@TpTG and PMo<sub>12</sub>; (b) FT-IR spectra of SiW<sub>12</sub>, TpTG and SiW<sub>12</sub>@TpTG.

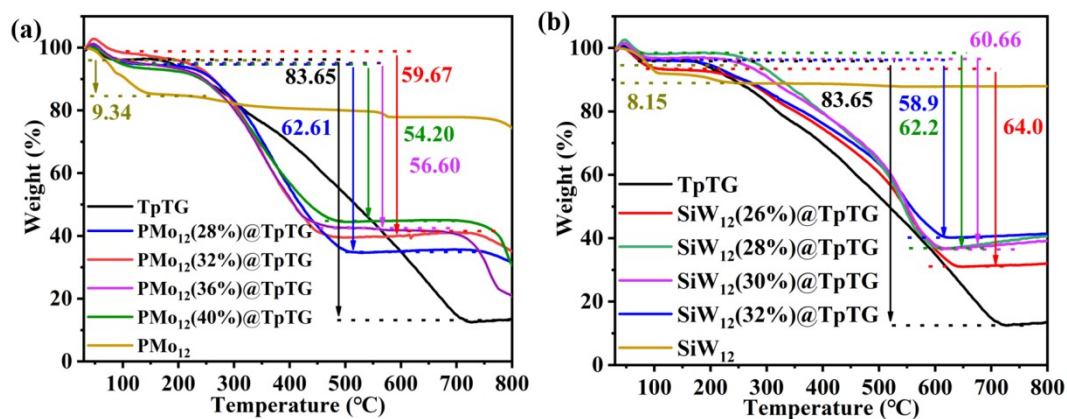

Fig. S3 (a) TGA of TpTG, PMo<sub>12</sub>@TpTG and PMo<sub>12</sub>; (b) TGA of TpTG, SiW<sub>12</sub>@TpTG and SiW<sub>12</sub>.

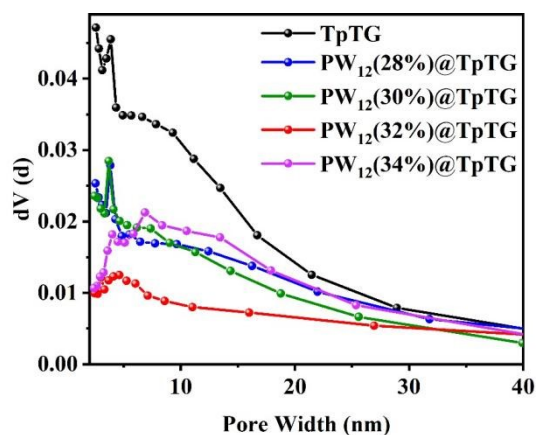

Fig. S4 Aperture diagram of TpTG, PW<sub>12</sub>, PW<sub>12</sub>(28%)@TpTG, PW<sub>12</sub>(30%)@TpTG, PW<sub>12</sub>(32%)@TpTG, and PW<sub>12</sub>(34%)@TpTG.

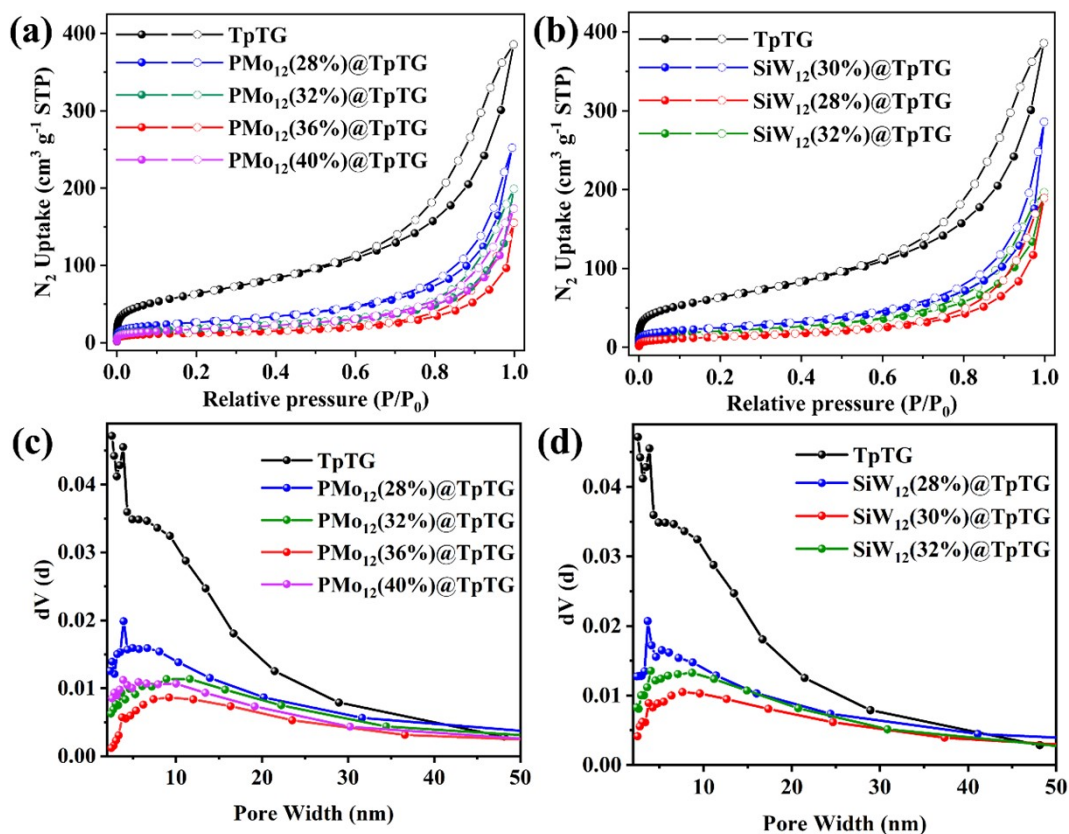

**Fig. S5** (a) N<sub>2</sub> sorption isotherms of TpTG and different PMo<sub>12</sub> added amounts of PMo<sub>12</sub>@TpTG measured at 77 K; (b) N<sub>2</sub> sorption isotherms of TpTG and different SiW<sub>12</sub> added amounts of SiW<sub>12</sub>@TpTG measured at 77 K; (c) The pore size distribution of TpTG and PMo<sub>12</sub>@TpTG; (d) The pore size distribution of TpTG and SiW<sub>12</sub>@TpTG.

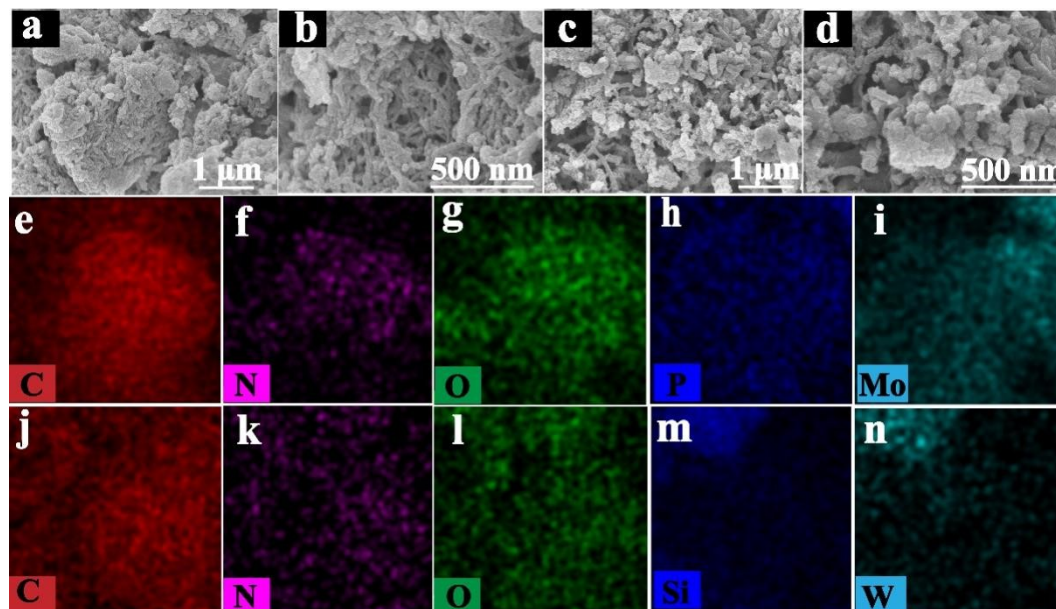

**Fig. S6** (a–b) SEM image of PMo<sub>12</sub>(36%)@TpTG; (c–d) SEM images of SiW<sub>12</sub>(30%)@TpTG; (e–i) EDS images of PMo<sub>12</sub>(36%)@TpTG; (j–n) EDS mapping images of SiW<sub>12</sub>(30%)@TpTG.

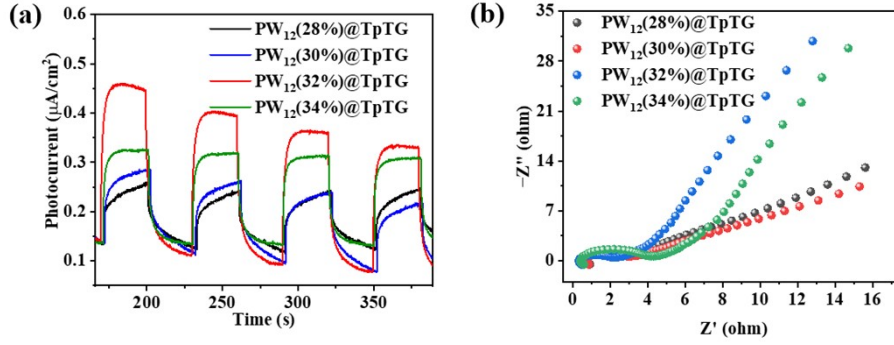

**Fig. S7** (a) Transient photocurrent responses of  $\text{PW}_{12}(28\%)@TpTG$ ,  $\text{PW}_{12}(30\%)@TpTG$ ,  $\text{PW}_{12}(32\%)@TpTG$ , and  $\text{PW}_{12}(34\%)@TpTG$ ; (b) EIS Nyquist plots of  $\text{PW}_{12}(28\%)@TpTG$ ,  $\text{PW}_{12}(30\%)@TpTG$ ,  $\text{PW}_{12}(32\%)@TpTG$ , and  $\text{PW}_{12}(34\%)@TpTG$ .

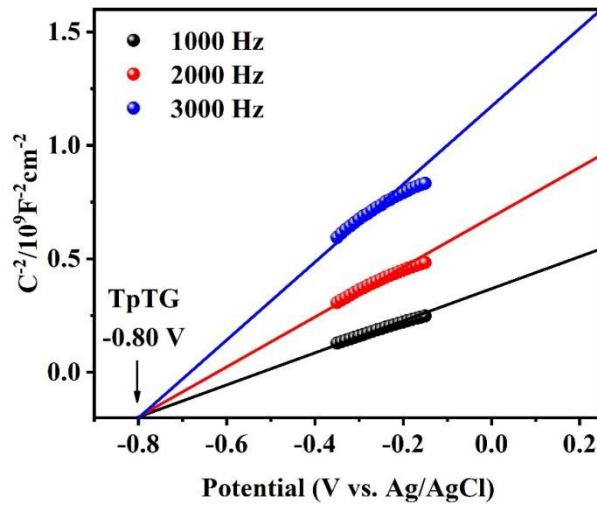

**Fig. S8** M-S plots of TpTG.

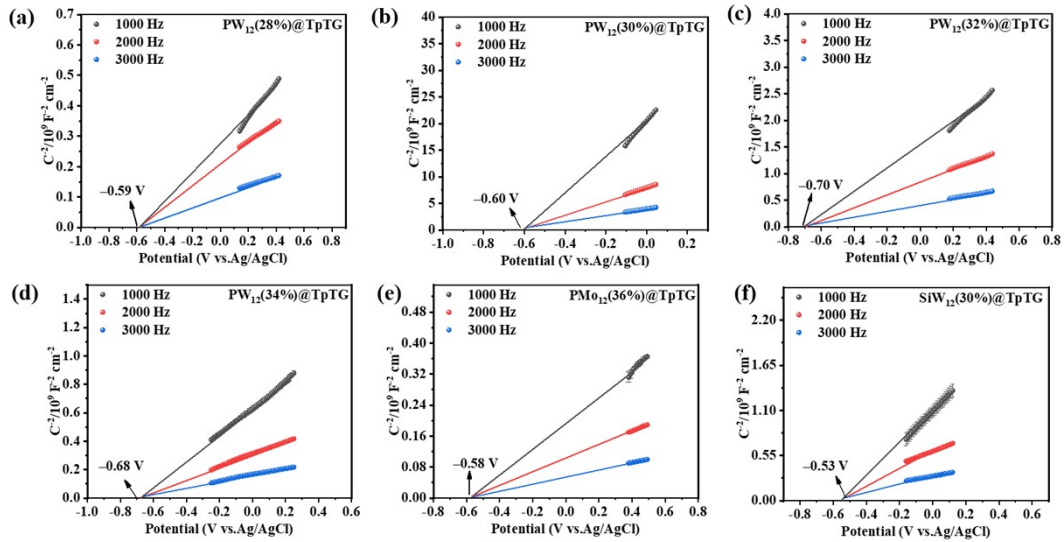

**Fig. S9** M-S plots of (a)  $\text{PW}_{12}(28\%)@TpTG$ , (b)  $\text{PW}_{12}(30\%)@TpTG$ , (c)  $\text{PW}_{12}(32\%)@TpTG$ , (d)  $\text{PW}_{12}(34\%)@TpTG$ , (e)  $\text{PMo}_{12}(36\%)@TpTG$ , and (f)  $\text{SiW}_{12}(30\%)@TpTG$ .

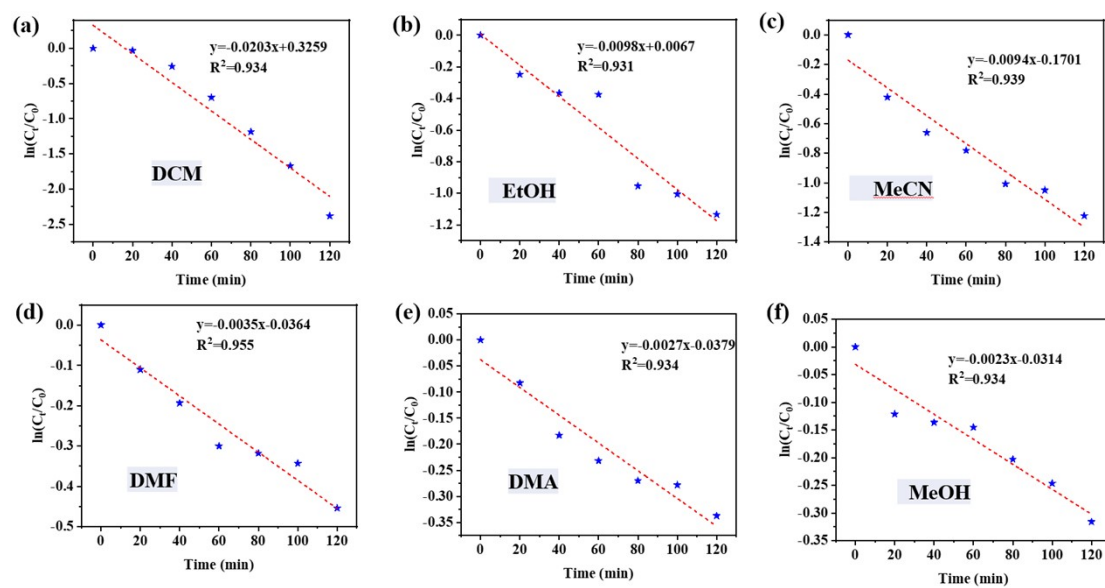

**Fig. S10** Reaction kinetics of  $PW_{12}(34\%)@TpTG$  under different solvent conditions.

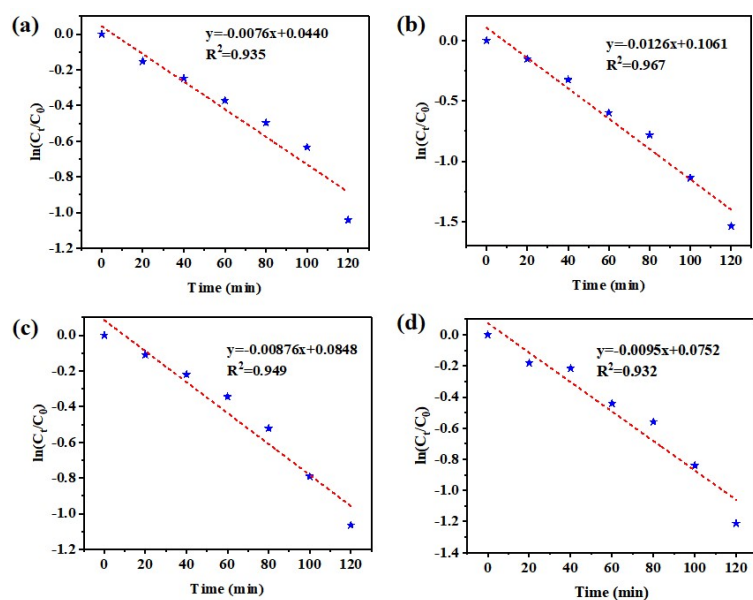

**Fig. S11** Effect of  $H_2O_2$  dosage on MPS oxidation: (a) 1.1 mmol, (b) 1.2 mmol, (c) 1.3 mmol, and (d) 1.5 mmol.

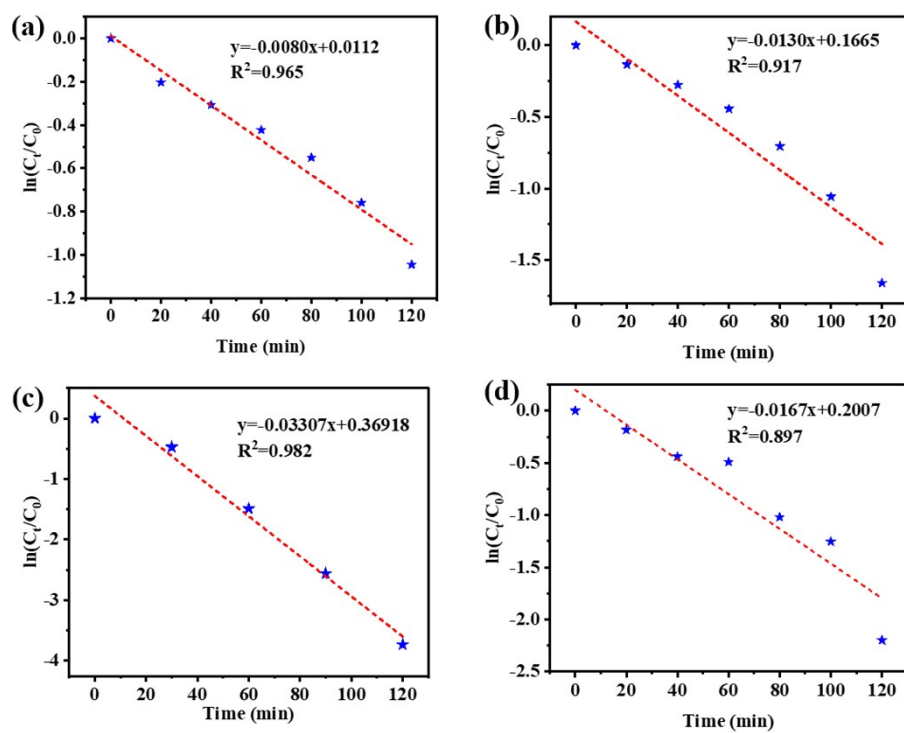

**Fig. S12** Kinetic plots of MPS oxidation over  $PW_{12}@TpTG$  with different  $PW_{12}$  loadings: (a) 28%, (b) 30%, (c) 32%, and (d) 34%.

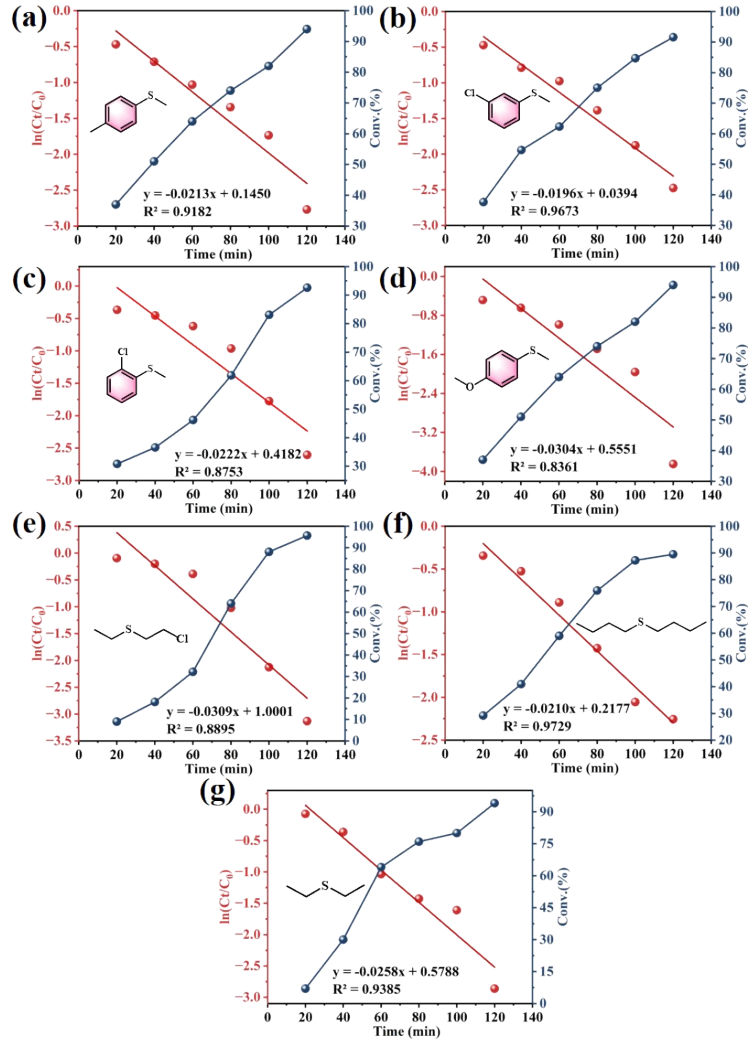

**Fig. S13** Pseudo-first-order kinetic plots for the oxidation of (a) methyl phenyl sulfide, (b) 3-chloro methyl phenyl sulfide, (c) 2-chloro methyl phenyl sulfide, (d) methoxy methyl phenyl sulfide, (e) 2-chloroethyl sulfide, (f) diethyl sulfide, and (g) dipropyl sulfide.

**Table S1** Physicochemical properties of POM@TpTG composites.

| Composites                   | $S_{BET}$ ( $m^2 \cdot g^{-1}$ ) | Vtotal ( $cc \cdot g^{-1}$ ) | Average pore size (nm) |
|------------------------------|----------------------------------|------------------------------|------------------------|
| TpTG                         | 230.84                           | 0.60                         | 5.17                   |
| PW <sub>12</sub> (28%)@TpTG  | 133.60                           | 0.44                         | 6.52                   |
| PW <sub>12</sub> (30%)@TpTG  | 123.69                           | 0.34                         | 5.54                   |
| PW <sub>12</sub> (32%)@TpTG  | 43.05                            | 0.27                         | 5.88                   |
| PW <sub>12</sub> (34%)@TpTG  | 111.90                           | 0.39                         | 6.96                   |
| PMO <sub>12</sub> (28%)@TpTG | 92.70                            | 0.39                         | 8.42                   |
| PMO <sub>12</sub> (32%)@TpTG | 63.76                            | 0.31                         | 9.66                   |

|                              |       |      |      |
|------------------------------|-------|------|------|
| PMo <sub>12</sub> (36%)@TpTG | 42.85 | 0.24 | 11.2 |
| PMo <sub>12</sub> (40%)@TpTG | 60.85 | 0.27 | 8.82 |
| SiW <sub>12</sub> (28%)@TpTG | 88.67 | 0.44 | 9.98 |
| SiW <sub>12</sub> (30%)@TpTG | 48.50 | 0.30 | 6.94 |
| SiW <sub>12</sub> (32%)@TpTG | 73.40 | 0.30 | 8.28 |

**Table S2** The photoelectric performance and catalytic rate of PW<sub>12</sub>@TpTG.

| Sample                      | Photocurrent density<br>( $\mu\text{A}/\text{cm}^2$ ) | Rct ( $\Omega$ ) | k <sub>rec</sub> (s <sup>-1</sup> ) | Rate constant k<br>(min <sup>-1</sup> ) |
|-----------------------------|-------------------------------------------------------|------------------|-------------------------------------|-----------------------------------------|
| PW <sub>12</sub> (28%)@TpTG | 2.0                                                   | 1250             | 0.85                                | 0.0080                                  |
| PW <sub>12</sub> (30%)@TpTG | 3.0                                                   | 1120             | 0.72                                | 0.0130                                  |
| PW <sub>12</sub> (32%)@TpTG | 4.5                                                   | 620              | 0.48                                | 0.0330                                  |
| PW <sub>12</sub> (34%)@TpTG | 3.2                                                   | 880              | 0.65                                | 0.0167                                  |

**Table S3** Solvent effect on the photocatalytic oxidation of MPS.

| Solvent | Dielectric constant ( $\epsilon$ ) | Rate constant k (min <sup>-1</sup> ) | Con. (%) | Sel. (%) |
|---------|------------------------------------|--------------------------------------|----------|----------|
| CHY     | 2.02                               | 0.0331                               | 99.0     | 99.6     |
| DCM     | 8.93                               | 0.0203                               | 90.8     | 99.0     |
| EtOH    | 24.3                               | 0.0098                               | 67.8     | 32.2     |
| MeCN    | 37.5                               | 0.0094                               | 70.6     | 29.4     |
| DMF     | 38.3                               | 0.0035                               | 36.5     | 63.5     |
| DMA     | 37.8                               | 0.0027                               | 28.6     | 71.4     |
| MeOH    | 32.7                               | 0.0023                               | 27.0     | 72.9     |

**Table S4** The oxidation effect of POM@TpTG composites with different POMs loadings on photocatalytic MPS was studied. <sup>a</sup>

| Entry | Catalyst                     | Conv. (%) | Sel. <sup>b</sup> (%) |
|-------|------------------------------|-----------|-----------------------|
| 1     | PW <sub>12</sub> (30%)@TpTG  | 93.7      | 99.5                  |
| 2     | PW <sub>12</sub> (32%)@TpTG  | 99.0      | 99.6                  |
| 3     | PW <sub>12</sub> (34%)@TpTG  | 98.2      | 99.5                  |
| 4     | PMo <sub>12</sub> (28%)@TpTG | 88.1      | 98.4                  |
| 5     | PMo <sub>12</sub> (32%)@TpTG | 92.3      | 99.1                  |
| 6     | PMo <sub>12</sub> (36%)@TpTG | 96.0      | 99.0                  |
| 7     | SiW <sub>12</sub> (28%)@TpTG | 40.7      | 77.1                  |
| 8     | SiW <sub>12</sub> (30%)@TpTG | 45.0      | 77.9                  |
| 9     | SiW <sub>12</sub> (32%)@TpTG | 41.3      | 65.9                  |

[a] Reaction conditions: 0.5 mmol MPS, 0.7 mmol% PW<sub>12</sub>(32%)@TpTG material, 1.3 mmol H<sub>2</sub>O<sub>2</sub>, 25 °C 300 W Xe lamp and reaction time 2.0 h; [b] the main product of is sulfone.

**Table S5** The Comparison of the photocatalytic performance of PW<sub>12</sub>@TpTG with state-of-the-art COF/MOF/POM-based photocatalysts for sulfide oxidation.

| Catalyst                            | Substrate | Light source                                  | Time   | Conv. (%) | Sel. (%) | Ref.      |
|-------------------------------------|-----------|-----------------------------------------------|--------|-----------|----------|-----------|
| PW <sub>12</sub> @TpTG              | MPS       | 300 W Xe lamp ( $\lambda \geq 425$ nm)        | 2 h    | 99.0      | 99.6     | This work |
| TpBpy-COF                           | MPS       | blue LED                                      | 6 h    | 99.9      | 99.9     | [1]       |
| P <sub>2</sub> W <sub>18</sub> -COF | MPS       | 10 W white LED                                | 18 min | 99        | 97       | [2]       |
| SiW <sub>12</sub> -CTF              | MPS       | 10 W 425 nm LED                               | 2 h    | 97        | 99       | [3]       |
| PW <sub>12</sub> -CTF               | MPS       | 10 W 425 nm LED                               | 2 h    | 89        | 99       | [3]       |
| PMo <sub>12</sub> -CTF              | MPS       | 10 W 425 nm LED                               | 2 h    | 36        | 99       | [3]       |
| SiW <sub>12</sub> -CTF-2            | MPS       | 10 W 425 nm LED                               | 2 h    | 81        | 99       | [3]       |
| PMo <sub>12</sub> (46.1%)@RT-COF-1  | MPS       | Ultrasound-assisted                           | 2 h    | 49.5      | 16.6     | [4]       |
| HY-340                              | MPS       | 60 °C, 0.2 mL H <sub>2</sub> O <sub>2</sub> , | 2 h    | 100       | 70       | [5]       |

**Table S6** The selective oxidation of CEES catalyzed by PW<sub>12</sub>(32%)@TpTG was studied. <sup>a</sup>

| Entry | Catalyst (mmol%) | H <sub>2</sub> O <sub>2</sub> (mmol) | Conv. <sup>b</sup> (%) | Sel. <sup>c</sup> (%) |
|-------|------------------|--------------------------------------|------------------------|-----------------------|
| 1     | 0.8              | 1.4                                  | 86.9                   | 100                   |
| 2     | 0.9              | 1.4                                  | 99.4                   | 100                   |
| 3     | 1.1              | 1.4                                  | 98.2                   | 100                   |
| 4     | 0.9              | 1.1                                  | 93.1                   | 100                   |
| 5     | 0.9              | 1.2                                  | 95.7                   | 100                   |
| 6     | 0.9              | 1.3                                  | 96.1                   | 100                   |
| 7     | 0.9              | 1.3                                  | 98.7                   | 100                   |
| 8     | 0.9              | –                                    | 28.0                   | 86.8                  |
| 9     | –                | 1.3                                  | 47.6                   | 94.5                  |
| 10    | –                | –                                    | Trace                  | Trace                 |

[a] Reaction conditions: 0.5 mmol CEES and 3 mL CYH, 25 °C 300 W Xe lamp and reaction time 1.5 h; [b] measured by GC; [c] selectivity of CEESO<sub>2</sub>.

**Table S7** ICP-OES analysis of tungsten (W) leaching from PW<sub>12</sub>@TpTG catalyst after one catalytic cycle.

| Sample             | W(mg/L) <sup>a</sup> | W (mg/mL)             |
|--------------------|----------------------|-----------------------|
| Reference material | –0.0208              | 0                     |
| After 1st cycle    | 0.0155               | 7.75×10 <sup>–4</sup> |

|                 |         |   |
|-----------------|---------|---|
| After 2nd cycle | -0.0176 | 0 |
| After 3rd cycle | -0.0229 | 0 |
| After 4th cycle | -0.0210 | 0 |
| After 5th cycle | -0.0231 | 0 |

[a] Dilute 1 mL of sample to volume, test result of 50 mL

**Table S8** PW<sub>12</sub>(32%)@TpTG photocatalytic oxidation of different sulfides <sup>a</sup>.

| Entry | Substrate                                                                           | Product                                                                             | Conv. (%) | Sel. <sup>b</sup> (%) | TON   | TOF (h <sup>-1</sup> ) |
|-------|-------------------------------------------------------------------------------------|-------------------------------------------------------------------------------------|-----------|-----------------------|-------|------------------------|
| 1     | 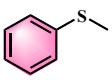   |    | 98.0      | 99.0                  | 319.5 | 159.8                  |
| 2     |    |    | 94.0      | 95.0                  | 300.5 | 150.2                  |
| 3     |   |   | 99.0      | 99.0                  | 294.4 | 147.2                  |
| 4     |  |  | 99.0      | 97.0                  | 280.9 | 140.4                  |
| 5     |  |  | 99.0      | 90.0                  | 311.7 | 155.9                  |
| 6     |  |  | 99.0      | 99.0                  | 273.5 | 136.8                  |
| 7     |  |  | 99.0      | 99.0                  | 299.8 | 149.9                  |
| 8     |  |  | 99.0      | 99.0                  | 303.1 | 151.5                  |

[a] Reaction conditions: 0.5 mmol MPS, 0.7 mmol % PW<sub>12</sub>(32%)@TpTG material, 1.3 mmol H<sub>2</sub>O<sub>2</sub>, 25 °C 300 W xenon lamp and reaction time 2.0 h; [b] the main product of is sulfone.

$$\text{TON} = \frac{n_{\text{prod}}}{n_{\text{PW}_{12}}} = \frac{n_{\text{sub}} C_{\text{Conv.}} C_{\text{Sel.}} M_{\text{PW}_{12}}}{m_{\text{cat}} w_{\text{PW}_{12}}}$$

$$\text{TOF} = \frac{\text{TON}}{t}$$

## References

[1] T. Huang, J. Kou, H. Yuan, H. Guo, K. Yuan, H. Li, F. Wang, Z. Dong, *Adv. Funct. Mater.*,

2025, **35**, 2413943.

[2] Q. Zhu, H. An, J. Fu, H. Sun, Y. Zhang, T. Q. Xu, *Inorg. Chem.*, 2025, **64**, 16223–16233.

[3] Q. Zhu, H. An, T. Q. Xu, Y. Chen, Y. Wei, H. Sun, *ACS Sustain. Chem. Eng.*, 2024, **12**, 1655–1665.

[4] J. L. Chen, J. Y. Wang, X. Y. Liu, N. Xu, H. Li, X. L. Wang, *Inorg. Chem. Commun.*, 2026, **190**, 116937.

[5] C. Batalha, D. C. Fajardo, H. V. Filho, J. B. G. Bruziquesi, C. G. O. de Oliveira, L. C. A. Gonçalves, M. A. Ramalho, T. d. C. Silva, A. C. *Korean J. Chem. Eng.*, 2023, **40**, 2434–2441.
